# Supplementary material
Source: publisher site journal article supplement (https://www.dovepress.com/article/280485)
Supplement: Supplementary file 1 [file get_supplementary_file.php]

Supplementary Tables

**Supplementary Table 1 Self-stigma and autistic symptoms among the three groups of patients with schizophrenia spectrum disorders**

|  | **Total samples (N=127)** | **Outpatients (N=55, 43.3%)** | **Short- stay patients (N=50, 39.4%)** | **Long- stay patients (N=22, 17.3%)** | **p value** |
| --- | --- | --- | --- | --- | --- |
| ISMI total score | 2.25±0.50 | 2.23±0.53 | 2.25±0.51 | 2.31±0.39 | 0.64 |
| Alienation | 2.29±0.73 | 2.25±0.78 | 2.33±0.75 | 2.32±0.59 | 0.64 |
| Stereotype endorsement | 2.05±0.58 | 2.01±0.59 | 2.01±0.56 | 2.24±0.56 | 0.29 |
| Perceived discrimination | 2.12±0.60 | 2.08±0.57 | 2.11±0.64 | 2.26±0.58 | 0.51 |
| Social withdrawal | 2.11±0.70 | 2.28±0.68 | 2.14±0.74 | 2.21±0.69 | 0.71 |
| Stigma resistance | 2.68±0.52 | 2.66±0.52 | 2.75±0.55 | 2.57±0.47 | 0.63 |
|  |  |  |  |  |  |
| AQ total score | 24.07±6.33 | 23.05±6.47 | 24.74±6.29 | 25.09±5.98 | 0.23 |
| Social skills | 4.83±2.41 | 4.71±2.41 | 4.98±2.34 | 4.77±2.67 | 0.73 |
| Attention switching | 5.25±1.81 | 5.07±1.81 | 5.48±1.89 | 5.18±1.62 | 0.37 |
| Attention to detail | 5.20±2.12 | 4.82±2.23 | 5.78±1.93 | 4.87±2.05 | 0.49 |
| Communication skills | 4.27±2.31 | 4.04±2.24 | 4.12±2.36 | 5.18±2.26 | 0.1 |
| Imagination | 4.52±2.00 | 4.41±1.93 | 4.38±2.16 | 5.09±1.77 | 0.36 |

**Notes:**

Long-stay inpatients refer to patients hospitalized for more than one year. Short-stay inpatients refer to patients hospitalized for less than six months.

This table shows the p-values for the Kruskal Wallis test comparing self-stigma and autistic symptoms among the three groups of patients with schizophrenia spectrum disorders.

**Abbreviations:**

IMSI, Internalized Stigma of Mental Illness; AQ, Autism-Spectrum Quotient.

**Supplementary Table 2 Bivariate correlations between self-stigma, autistic state, and patient characteristics**

|  | **Age** | **Age of onset** | **Number of hospitalizations** | **Education years** |
| --- | --- | --- | --- | --- |
| ISMI total score | -0.065 | -0.115 | 0.031 | 0.068 |
| Alienation | -0.125 | -0.125 | 0.028 | 0.062 |
| Stereotype endorsement | 0.29 | -0.124 | 0.102 | 0.052 |
| Perceived discrimination | -0.132 | -0.224 | 0.034 | 0.051 |
| Social withdrawal | -0.091 | -0.055 | 0.026 | 0.03 |
| Stigma resistance | 0.082 | 0.115 | 0.002 | 0.034 |
| AQ total score | -0.149 | **-0.298*** | -0.005 | -0.022 |
| Social skills | -0.087 | -0.187 | -0.207 | -0.133 |
| Attention switching | -0.029 | -0.216 | 0.032 | 0.034 |
| Attention to detail | -0.091 | -0.076 | 0.214 | 0.032 |
| Communication skills | -0.227 | -0.275 | -0.078 | -0.043 |
| Imagination | -0.039 | -0.149 | 0.033 | 0.009 |

**Notes:**

The data shows Spearman's rank correlation coefficients.

Bold values represent statistical significance at the p < 0.05 level.

*p < 0.05

**Abbreviations:**

IMSI, Internalized Stigma of Mental Illness; AQ, Autism-Spectrum Quotient.
